# Supplementary material
Source: MDPI journal article supplement (https://www.mdpi.com/2072-4292/9/10/994)
Supplement: s1 [file s1]

# Supplementary Materials: Sensitivity of common vegetation indices to the canopy structure of field crops

Xiaochen Zou and Matti Mõttus

This supplementary material supports the main text as follows:

Figure S1–3

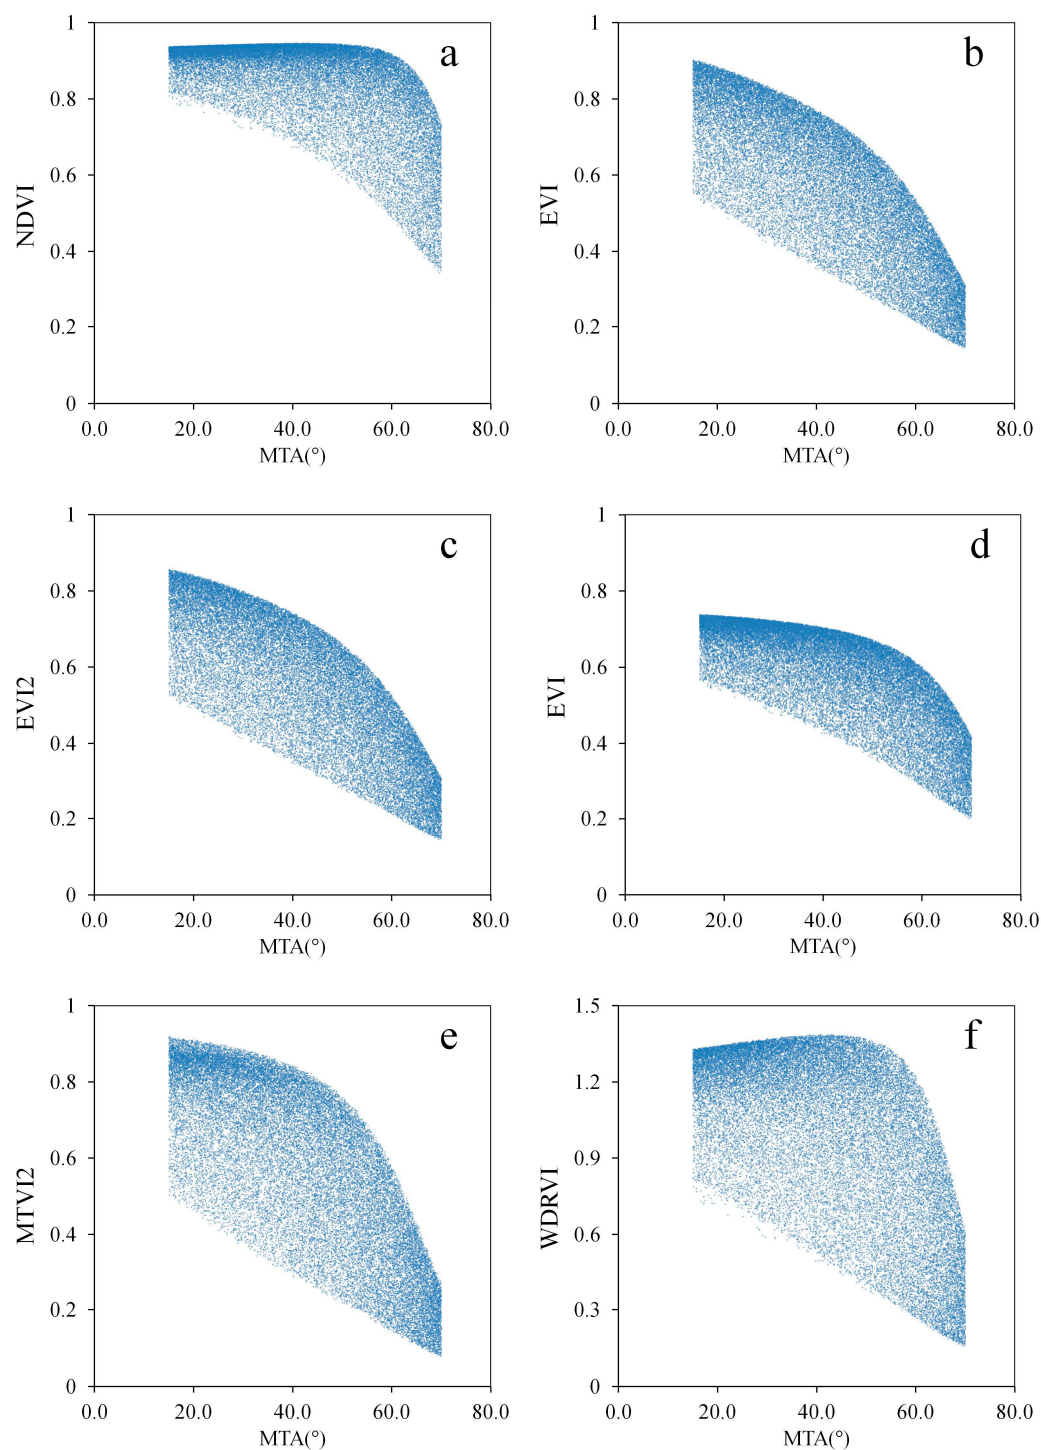

**Figure S1.** Model simulated relationships between MTA and VIs: (a) NDVI, (b) EVI, (c) EVI2, (d) OSAVI, (e) MTVI2, (f) WDRVI.

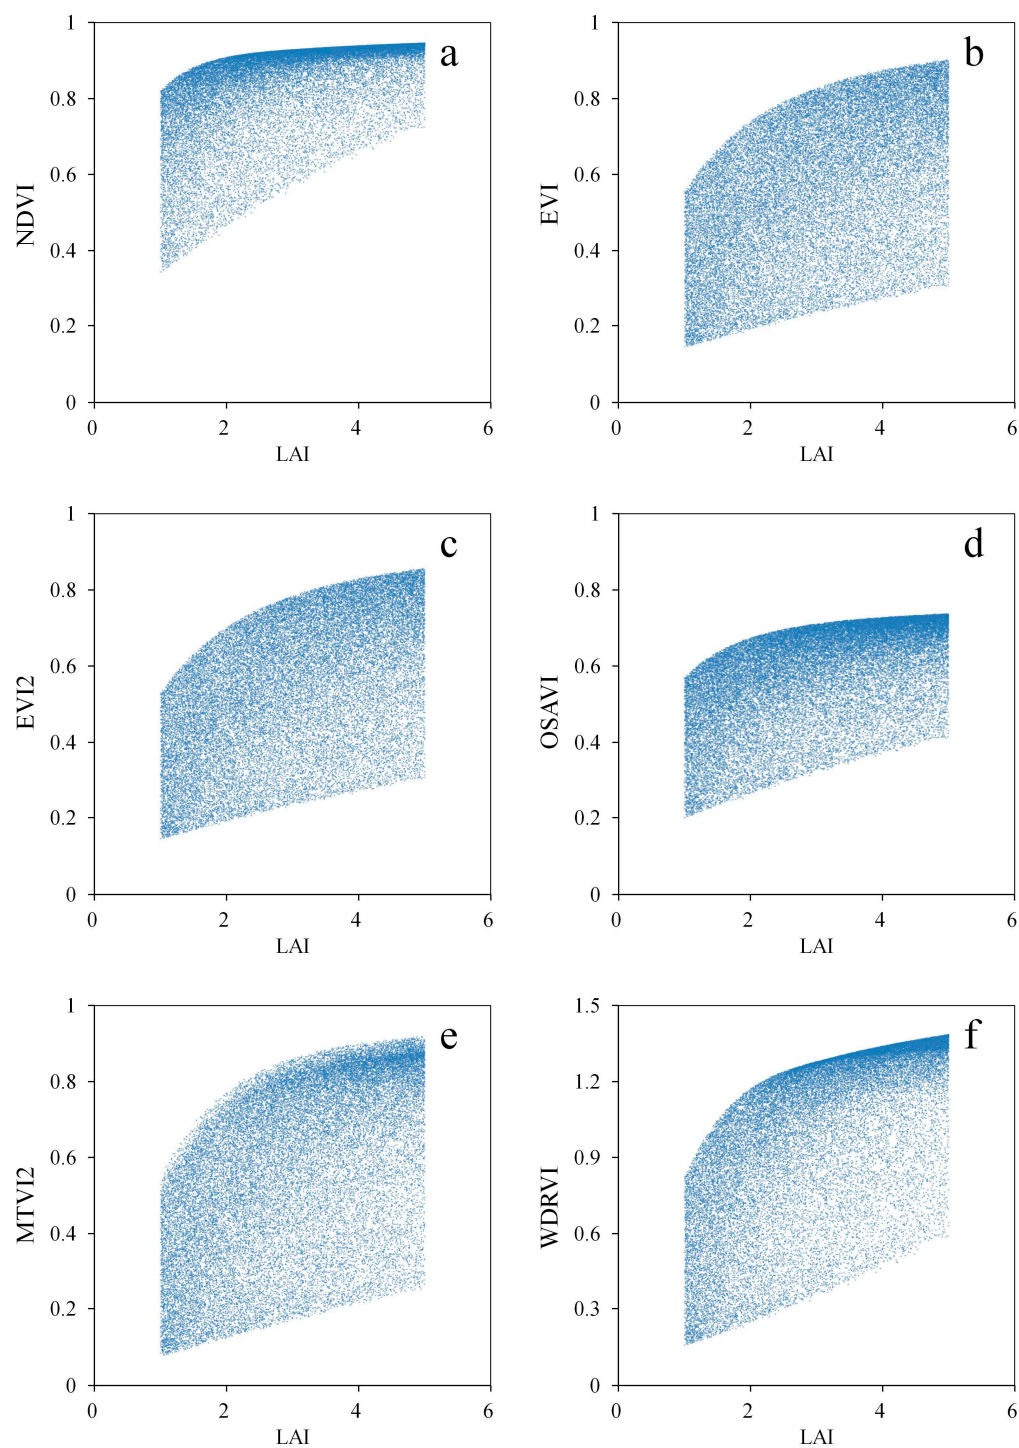

**Figure S2.** Model simulated relationships between LAI and VIs: (a) NDVI, (b) EVI, (c) EVI2, (d) OSAVI, (e) MTVI2, (f) WDRVI.

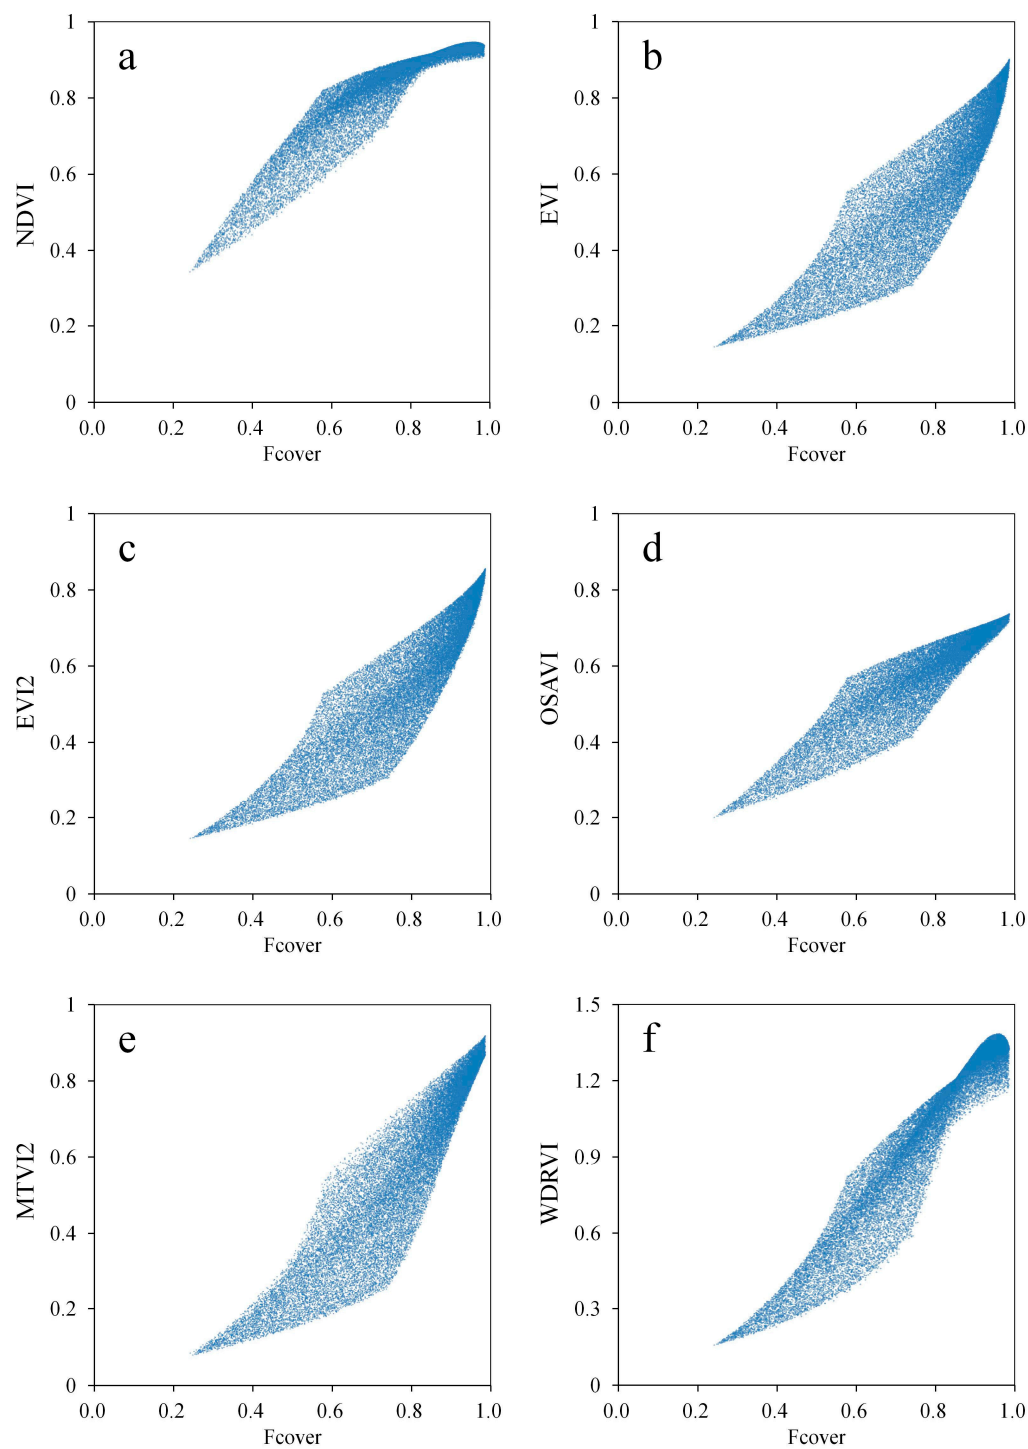

**Figure S3.** Model simulated relationships between Fcover and VIs: (a) NDVI, (b) EVI, (c) EVI2, (d) OSAVI, (e) MTVI2, (f) WDRVI.
